# Supplementary material for: A computational study of aromaticity and photophysical properties of unsymmetrical azatrioxa[8]circulenes
Source: Royal Society of Chemistry journal article supplement (doi:10.1039/c6nj03925a), 2017-01-01
Supplement: c6nj03925a1.pdf [file c6nj03925a1.pdf]

## A computational study of aromaticity and photophysical properties of unsymmetrical azatrioxa[8]circulenes

Gleb V. Baryshnikov,<sup>\*abc</sup> Rashid R. Valiev,<sup>acd</sup> Boris F. Minaev,<sup>abc</sup> Hans Ågren<sup>a</sup>

<sup>a</sup>*Division of Theoretical Chemistry and Biology, School of Biotechnology,  
KTH Royal Institute of Technology, 10691 Stockholm, Sweden.*

*E-mail: glibar@kth.se*

<sup>b</sup>*Department of Chemistry and Nanomaterials Science,  
Bogdan Khmelnytsky National University, Cherkasy, 18031, Ukraine*

<sup>c</sup>*Tomsk State University, 36 Lenin Avenue, Tomsk, Russia*

<sup>d</sup>*Tomsk Polytechnic University, 43a Lenin Avenue, Tomsk, Russia*

### Electronic supplementary information

| Aromatic pathways and current strength in nA/T                                      | Current plots. The blue is diatropic and the red is paratropic contribution into the total current density |
|-------------------------------------------------------------------------------------|------------------------------------------------------------------------------------------------------------|
| 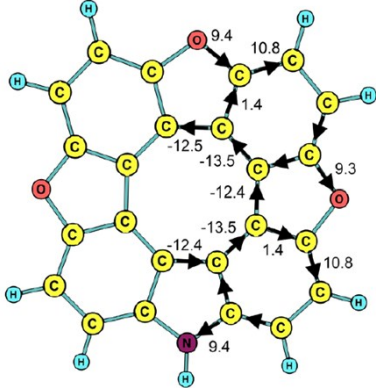 |                        |
|  |                        |

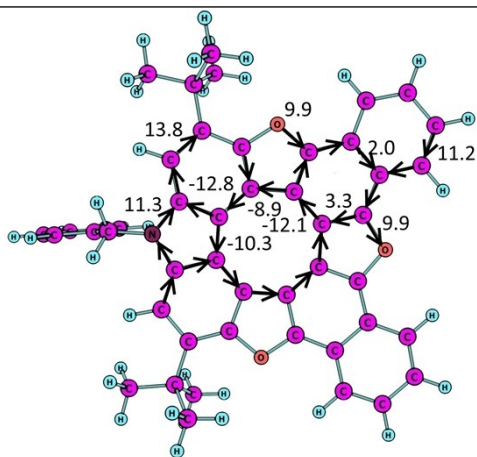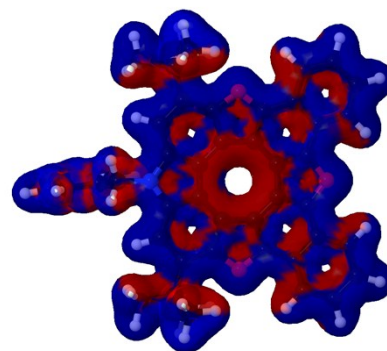

3

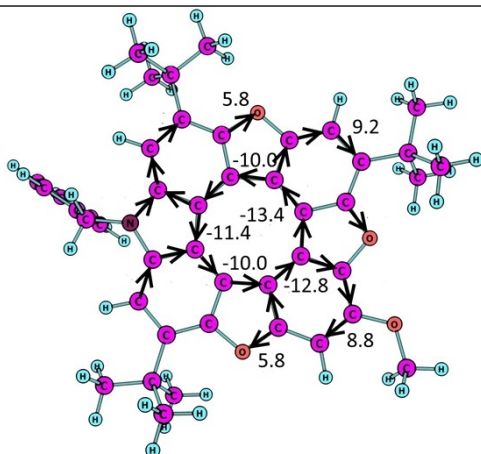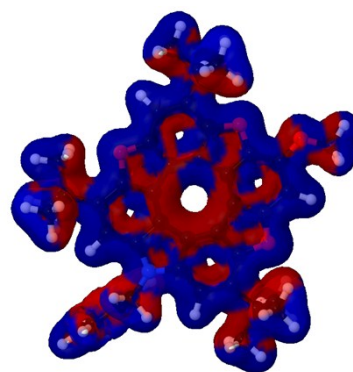

4

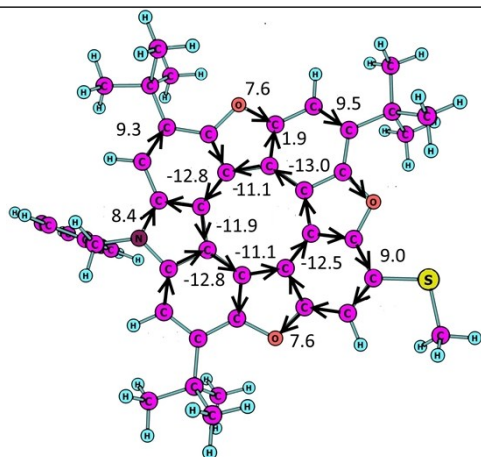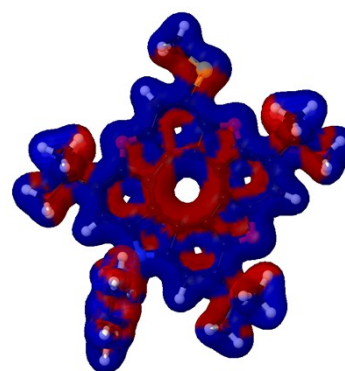

5

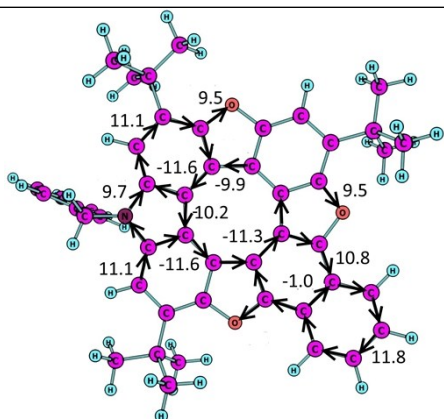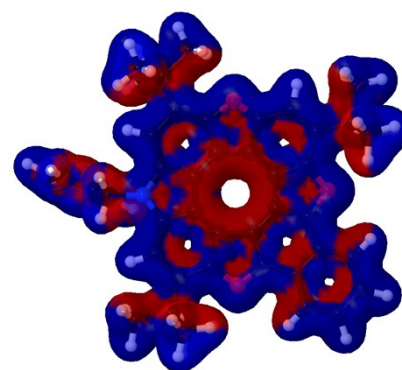

6

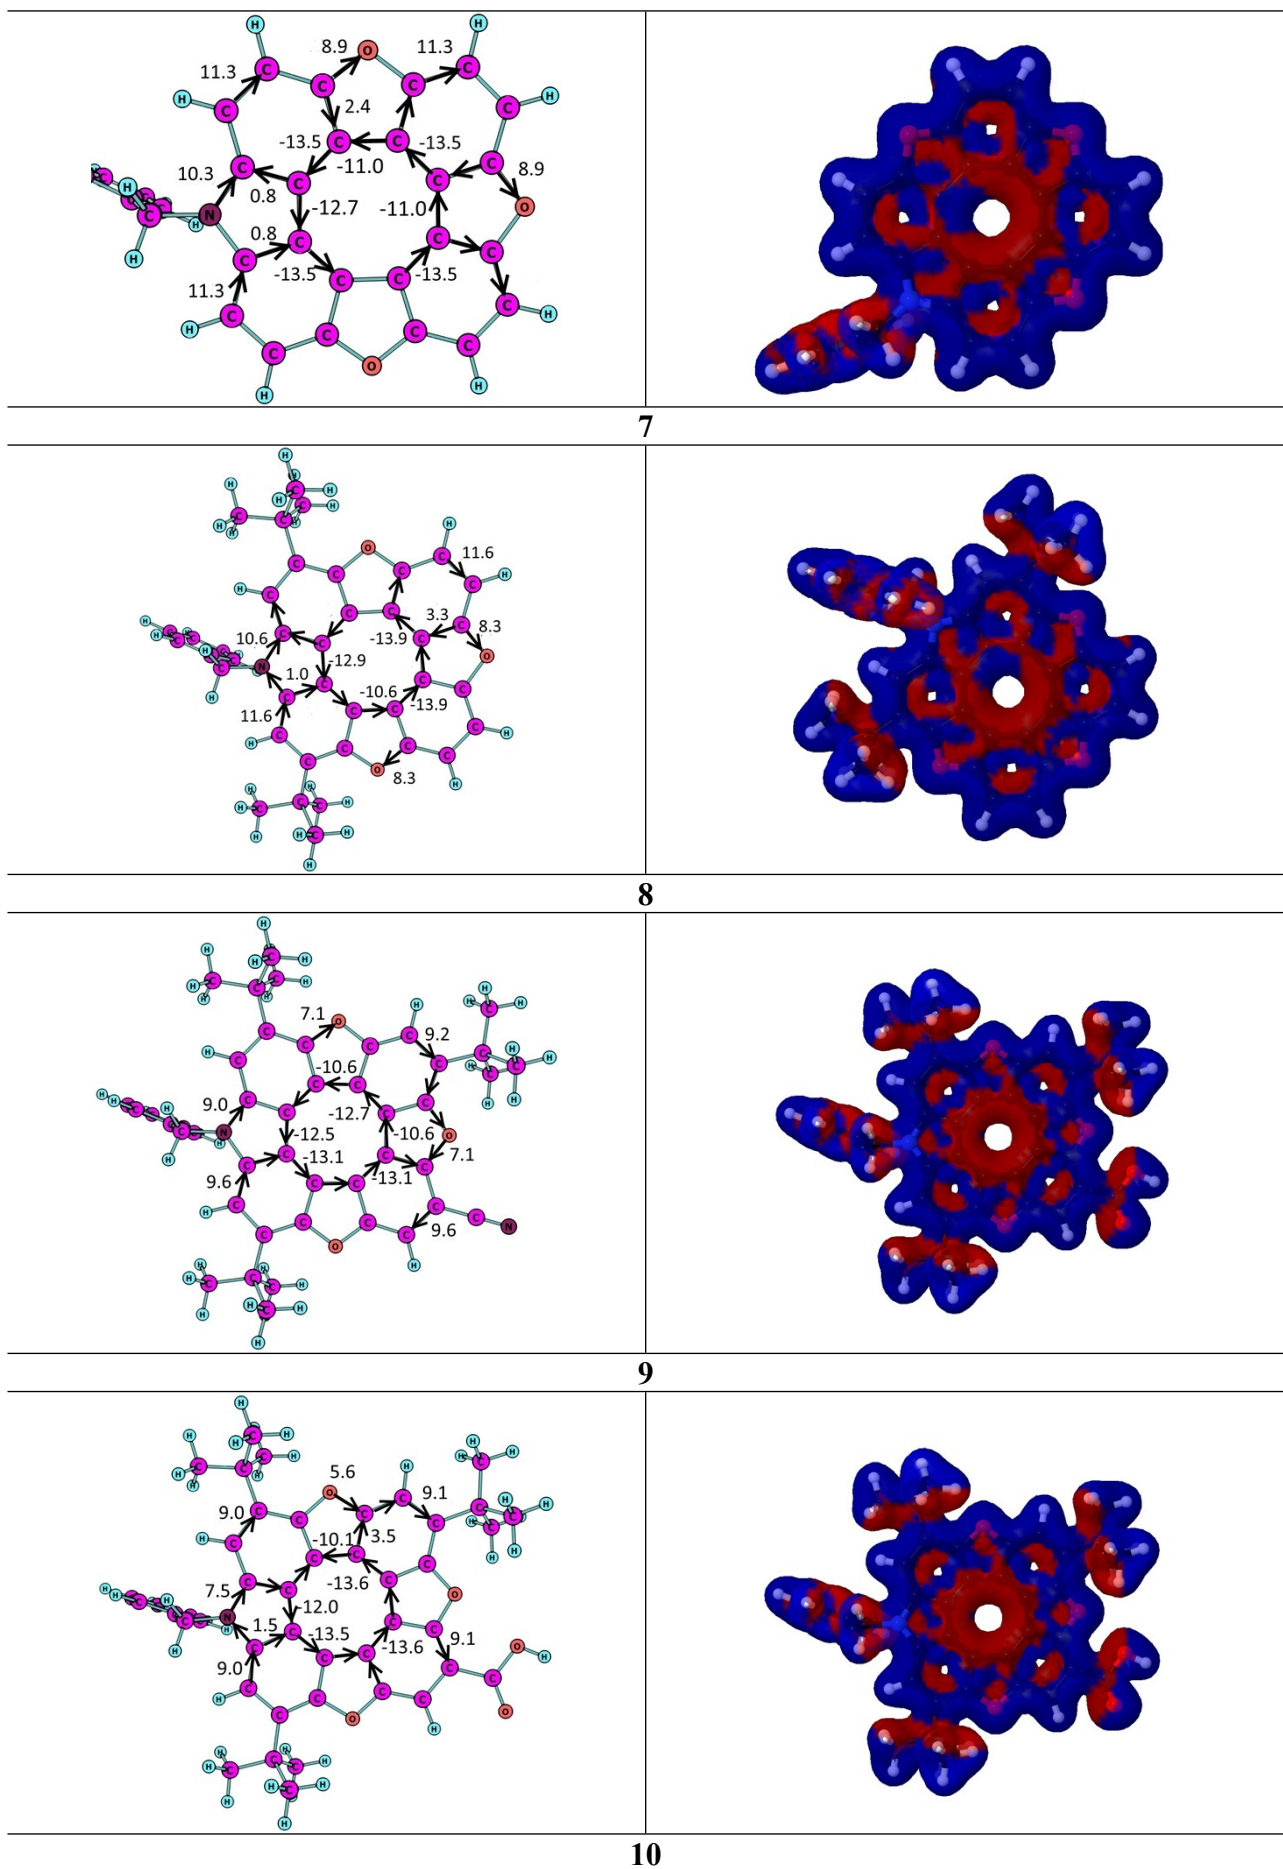

Figure S1. Ring current pathways and current density plots for the circulenes 1-10.
